# Supplementary material
Source: Frontiers journal article supplement (https://www.frontiersin.org/articles/503516)
Supplement: Data_Sheet_1.PDF [file Data_Sheet_1.PDF]

Supplementary Table 1 | Comparison between recommended dietary allowance (RDA) <sup>a</sup> and observed children’s energy-adjusted nutrient intake <sup>b</sup>

| Nutrients                         | Recommended Dietary Allowance <sup>a</sup> | Total<br>( N = 136 ) |       |        |                             | Good<br>( n = 56 ) |       |        |                             | Normal<br>( n = 55 ) |       |        |                             | Poor<br>( n = 25 ) |       |        |                             |
|-----------------------------------|--------------------------------------------|----------------------|-------|--------|-----------------------------|--------------------|-------|--------|-----------------------------|----------------------|-------|--------|-----------------------------|--------------------|-------|--------|-----------------------------|
|                                   |                                            | mean                 | SD    | Median | Deficiency <sup>c</sup> (%) | mean               | SD    | Median | Deficiency <sup>c</sup> (%) | mean                 | SD    | Median | Deficiency <sup>c</sup> (%) | mean               | SD    | Median | Deficiency <sup>c</sup> (%) |
| Protein<br>(g/EER day)            | 25g                                        | 46.7                 | 7.6   | 46.9   | 0.0                         | 49.0               | 7.0   | 48.9   | 0.0                         | 45.9                 | 8.0   | 45.3   | 0.0                         | 43.6               | 7.3   | 44.6   | 0.0                         |
| Dietary fiber<br>(g/EER per day)  | 10g <sup>d</sup>                           | 8.6                  | 2.4   | 8.3    | 78.7                        | 9.1                | 2.3   | 9.3    | 67.9                        | 8.4                  | 2.7   | 8.0    | 81.8                        | 7.6                | 1.2   | 7.6    | 96.0                        |
| Calcium<br>(mg/EER per day)       | 575mg <sup>e</sup>                         | 494.0                | 152.3 | 471.6  | 74.3                        | 535.4              | 130.2 | 543.8  | 62.5                        | 469.4                | 166.0 | 439.1  | 83.6                        | 459.0              | 155.5 | 454.7  | 80.0                        |
| n-3 fatty acid<br>(g/EER per day) | 1.2g <sup>e</sup>                          | 1.6                  | 0.4   | 1.5    | 12.5                        | 1.6                | 0.4   | 1.6    | 5.4                         | 1.5                  | 0.5   | 1.4    | 21.8                        | 1.6                | 0.3   | 1.6    | 8.0                         |
| Iron<br>(mg/EER per day)          | 5.25mg <sup>e</sup>                        | 5.2                  | 1.2   | 5.1    | 55.1                        | 5.5                | 1.1   | 5.6    | 42.9                        | 5.2                  | 1.3   | 5.1    | 60.0                        | 4.7                | 0.7   | 4.8    | 72.0                        |

<sup>a</sup> Referred to Japanese Dietary Reference Intakes 2015.(27)

<sup>b</sup> Children’s nutrient intakes were adjusted for each child’s estimated energy requirement (EER).

<sup>c</sup> Percentage of children who did not meet the RDA

<sup>d</sup> RDA of dietary fiber for 4-5 year-old children have been not clearly estimated, so we substituted DG (tentative dietary goals for preventing lifestyle-related diseases) for 6-7 year-old children.

<sup>e</sup> The mean value of RDA for male and female.
